# Supplementary material for: Comparing ant behaviour indices for fine-scale analyses
Source: PubMed Central journal article supplement (PMC6497665; doi:10.1038/s41598-019-43313-4), 2019-05-02
Supplement: 41598_2019_43313_MOESM3_ESM.pdf [file 41598_2019_43313_MOESM3_ESM.pdf]

1 **Title**

2 **Comparing ant behaviour indices for fine-scale analyses**

3 Patrick Krapf, Nadine Hochenegger, Wolfgang Arthofer, Birgit C. Schlick-Steiner, Florian M. Steiner

4 Molecular Ecology Group, Department of Ecology, University of Innsbruck, Technikerstr. 25,

5 Innsbruck 6020, Austria

6

7 Table S1. Characteristics of the colonies assayed.

| <b>Data set</b>   | <b>ID</b> | <b>Location</b> | <b>Country</b> | <b>Species</b>     | <b>Latitude</b> | <b>Longitude</b> |
|-------------------|-----------|-----------------|----------------|--------------------|-----------------|------------------|
| <b>Data Set 1</b> | K1        | Kuehtai         | Austria        | <i>T. alpestre</i> | 47.21923 N      | 11.07521 E       |
| <b>Data Set 1</b> | K2        | Kuehtai         | Austria        | <i>T. alpestre</i> | 47.21929 N      | 11.07582 E       |
| <b>Data Set 1</b> | P1        | Penser Joch     | Italy          | <i>T. alpestre</i> | 46.81439 N      | 11.44237 E       |
| <b>Data Set 1</b> | P2        | Penser Joch     | Italy          | <i>T. alpestre</i> | 46.81404 N      | 11.44196 E       |
| <b>Data Set 2</b> | 18986     | Kuehtai         | Austria        | <i>T. alpestre</i> | 47.21935 N      | 11.07549 E       |
| <b>Data Set 2</b> | 18987     | Kuehtai         | Austria        | <i>T. alpestre</i> | 47.21925 N      | 11.07578 E       |
| <b>Data Set 2</b> | 18988     | Kuehtai         | Austria        | <i>T. alpestre</i> | 47.21423 N      | 10.99767 E       |
| <b>Data Set 2</b> | 18989     | Kuehtai         | Austria        | <i>T. alpestre</i> | 47.21407 N      | 10.99767 E       |
| <b>Data Set 2</b> | 18992     | Penser Joch     | Italy          | <i>T. alpestre</i> | 46.81412 N      | 11.44198 E       |
| <b>Data Set 2</b> | 18993     | Penser Joch     | Italy          | <i>T. alpestre</i> | 46.8144 N       | 11.44244 E       |
| <b>Data Set 3</b> | 17808     | Kuehtai         | Austria        | <i>T. alpestre</i> | 47.2097 N       | 11.1025 E        |
| <b>Data Set 3</b> | 17809     | Kuehtai         | Austria        | <i>T. alpestre</i> | 47.2192 N       | 11.0769 E        |
| <b>Data Set 3</b> | 17810     | Kuehtai         | Austria        | <i>T. alpestre</i> | 47.2096 N       | 11.1024 E        |
| <b>Data Set 3</b> | 17811     | Kuehtai         | Austria        | <i>T. alpestre</i> | 47.2099 N       | 11.1036 E        |
| <b>Data Set 3</b> | 17812     | Kuehtai         | Austria        | <i>T. alpestre</i> | 47.2099 N       | 11.1035 E        |
| <b>Data Set 3</b> | 17813     | Kuehtai         | Austria        | <i>T. alpestre</i> | 47.2097 N       | 11.0847 E        |
| <b>Data Set 3</b> | 17815     | Kuehtai         | Austria        | <i>T. alpestre</i> | 47.2192 N       | 11.0756 E        |
| <b>Data Set 3</b> | 17816     | Kuehtai         | Austria        | <i>T. alpestre</i> | 47.2192 N       | 11.0758 E        |
| <b>Data Set 3</b> | 17817     | Kuehtai         | Austria        | <i>T. alpestre</i> | 47.2194 N       | 11.0767 E        |
| <b>Data Set 3</b> | 17818     | Kuehtai         | Austria        | <i>T. alpestre</i> | 47.2208 N       | 10.9858 E        |
| <b>Data Set 3</b> | 17819     | Kuehtai         | Austria        | <i>T. alpestre</i> | 47.2214 N       | 10.9861 E        |

8 Note: ID represents a code for different nests used in behaviour assays.

Fig. S1

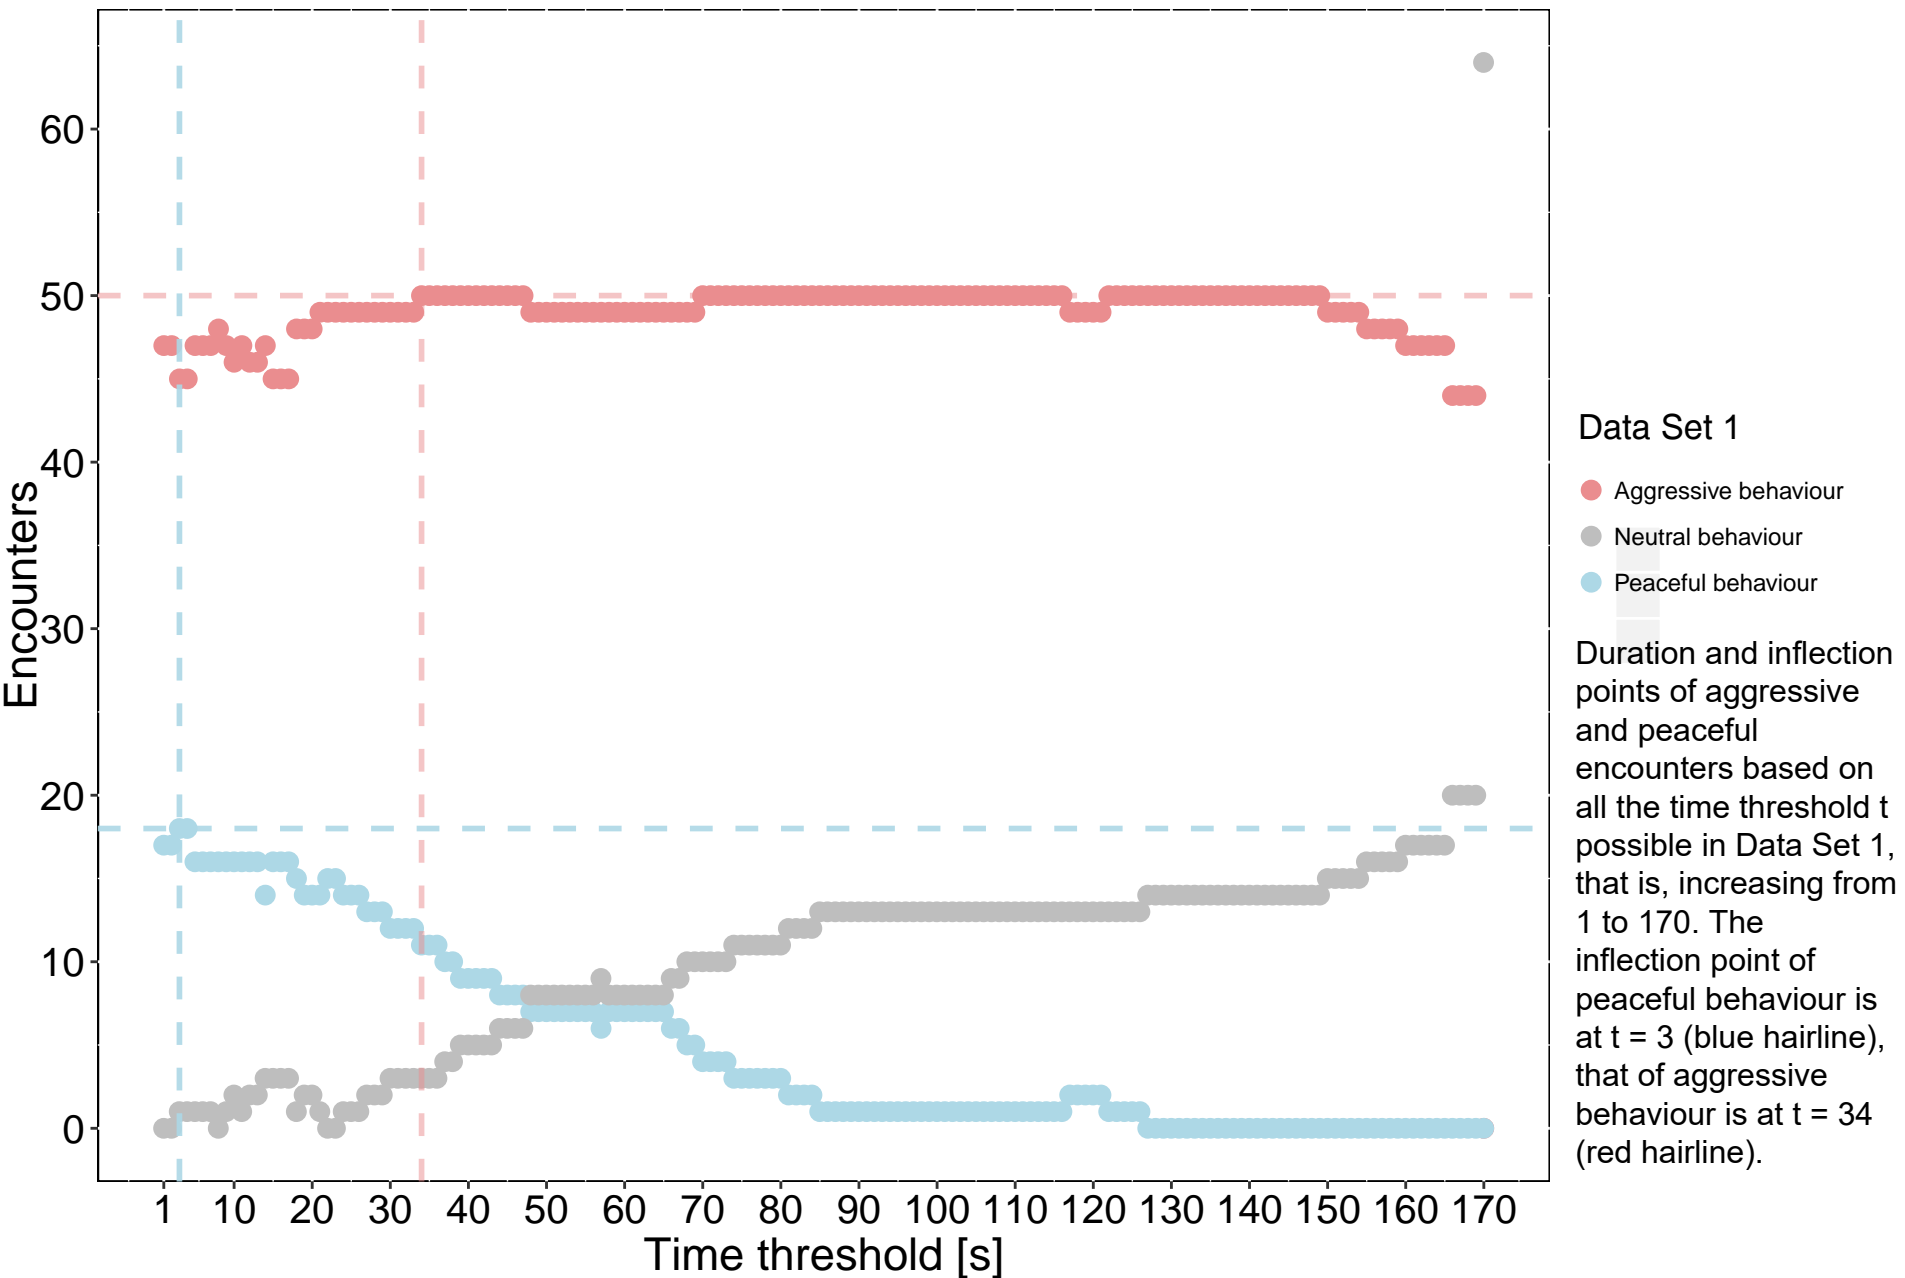

## Data Set 1 - intranest encounters

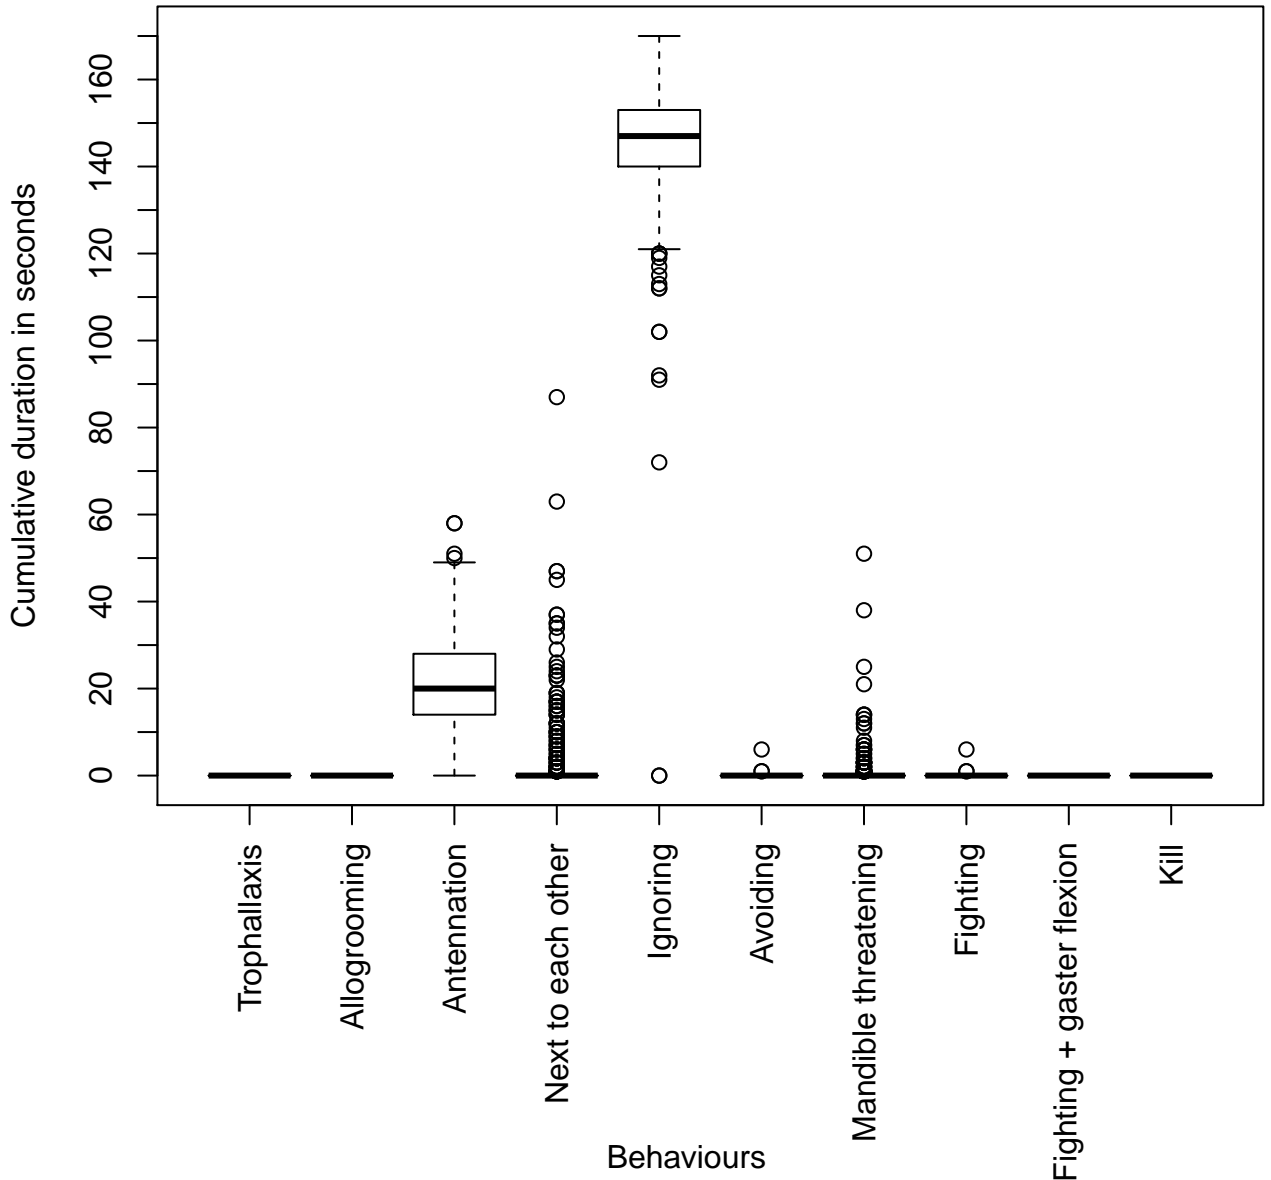

Fig. S2. Behaviour frequency boxplot of all intranest encounters of Data Set 1 (n = 4 encounters per each time point after collection, adding up to 64 intranest encounters).



## Data Set 2 – intranest encounters

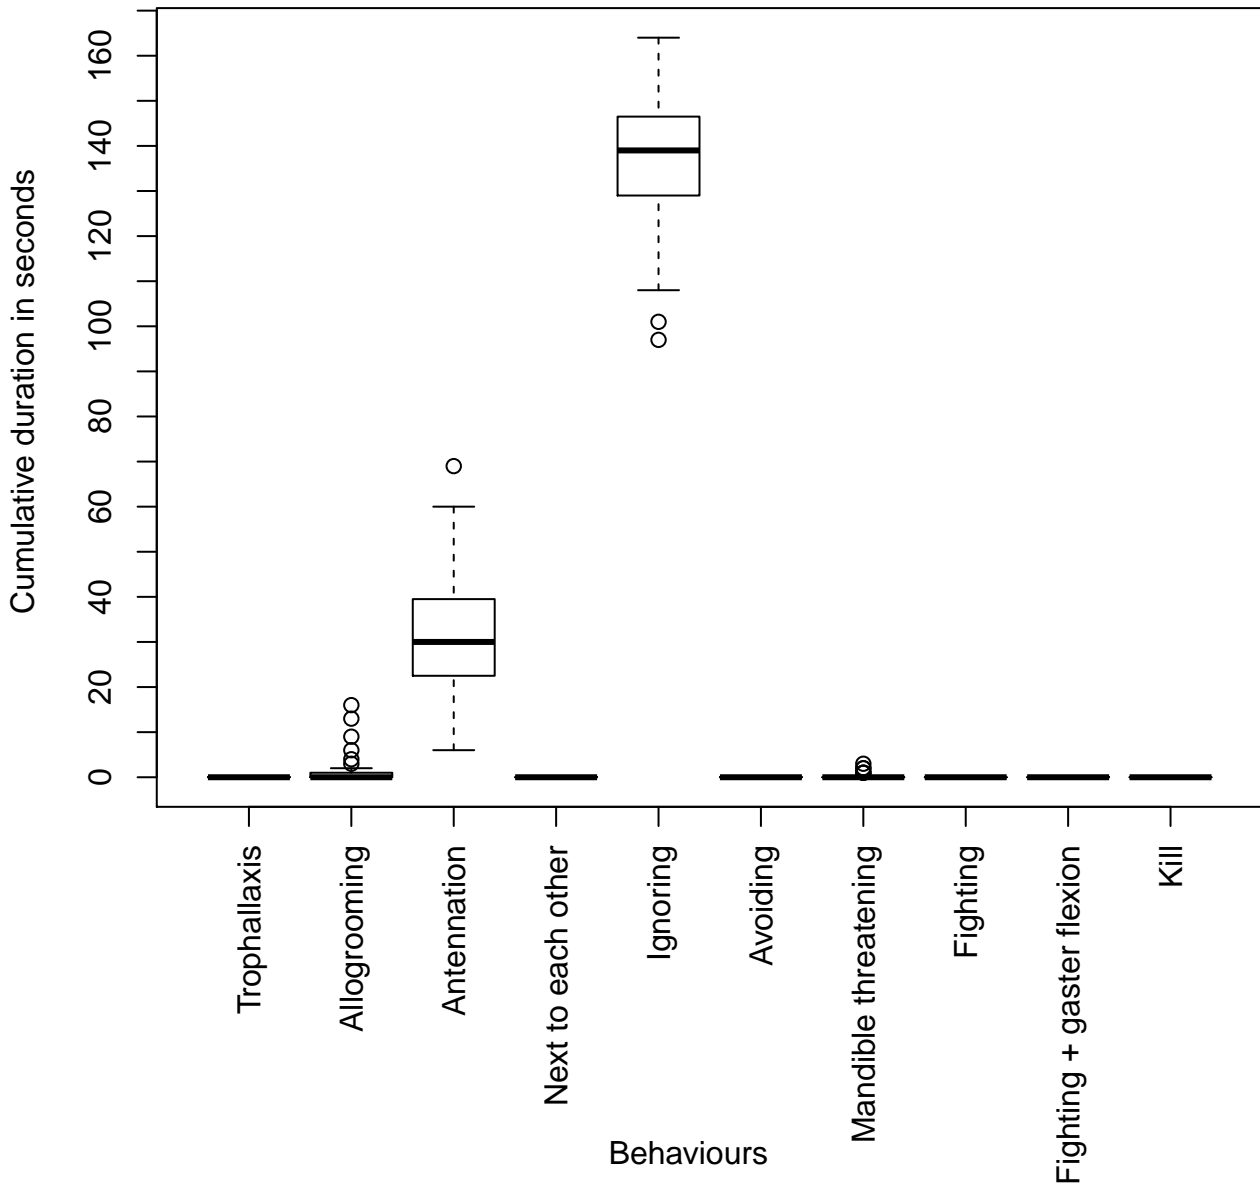

Fig. S4. Behaviour frequency boxplot of all intranest encounters of Data Set 2 (n = 6).

## Data Set 2 – internet encounters

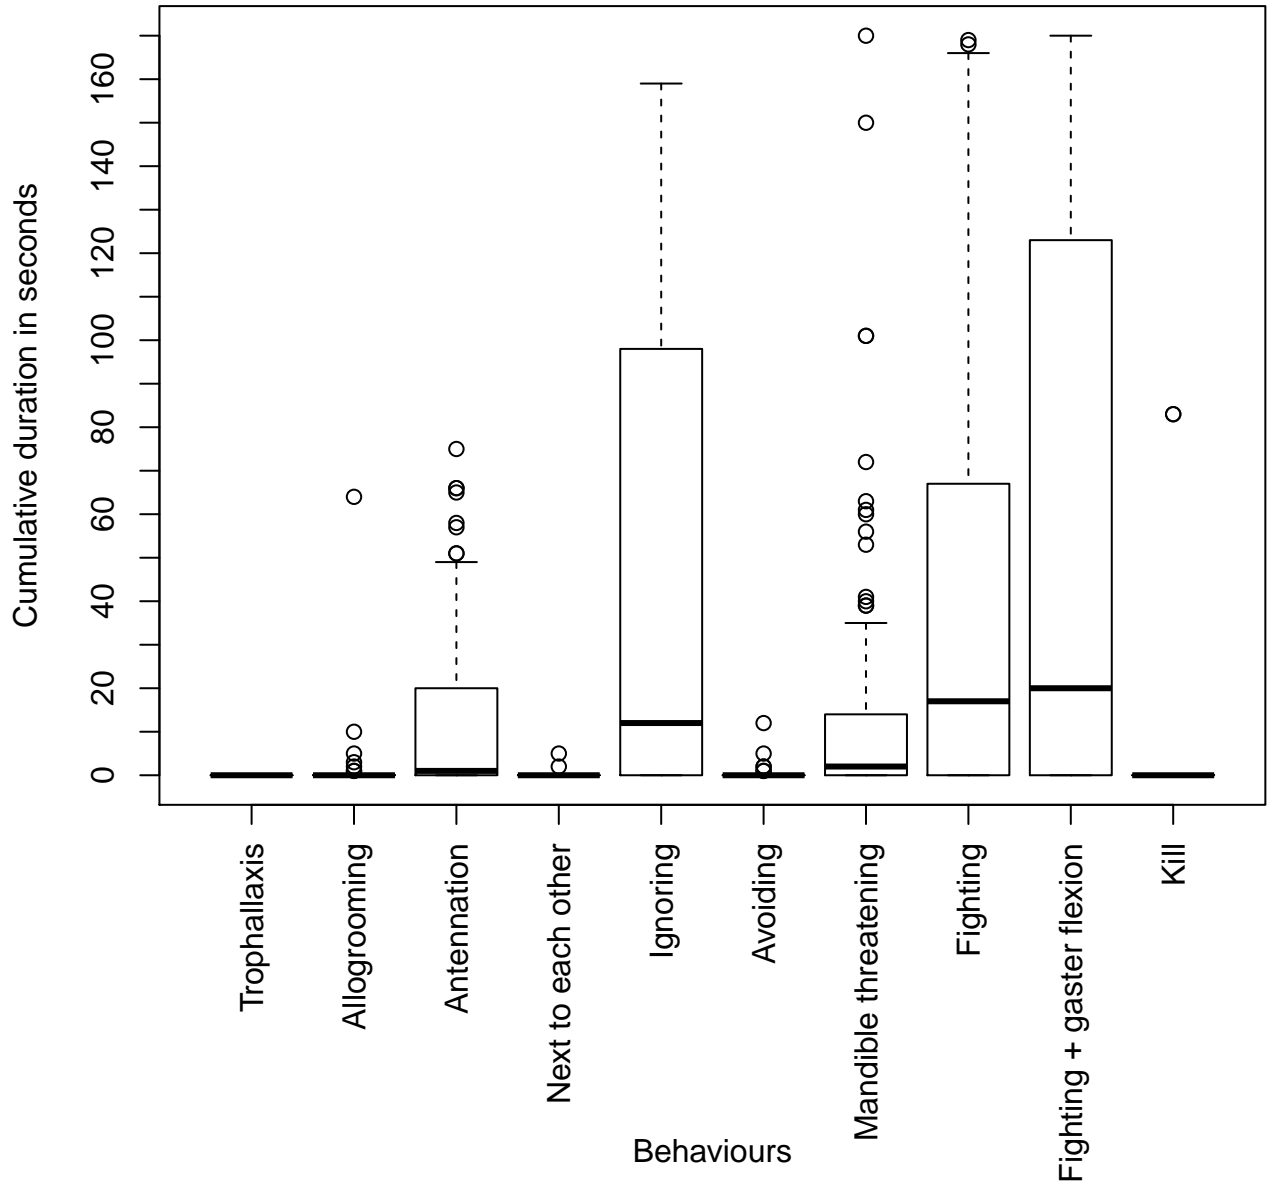

Fig. S5. Behaviour frequency boxplot of all internet encounters of Data Set 2 (n = 22).

### Data Set 3 – intranest encounters

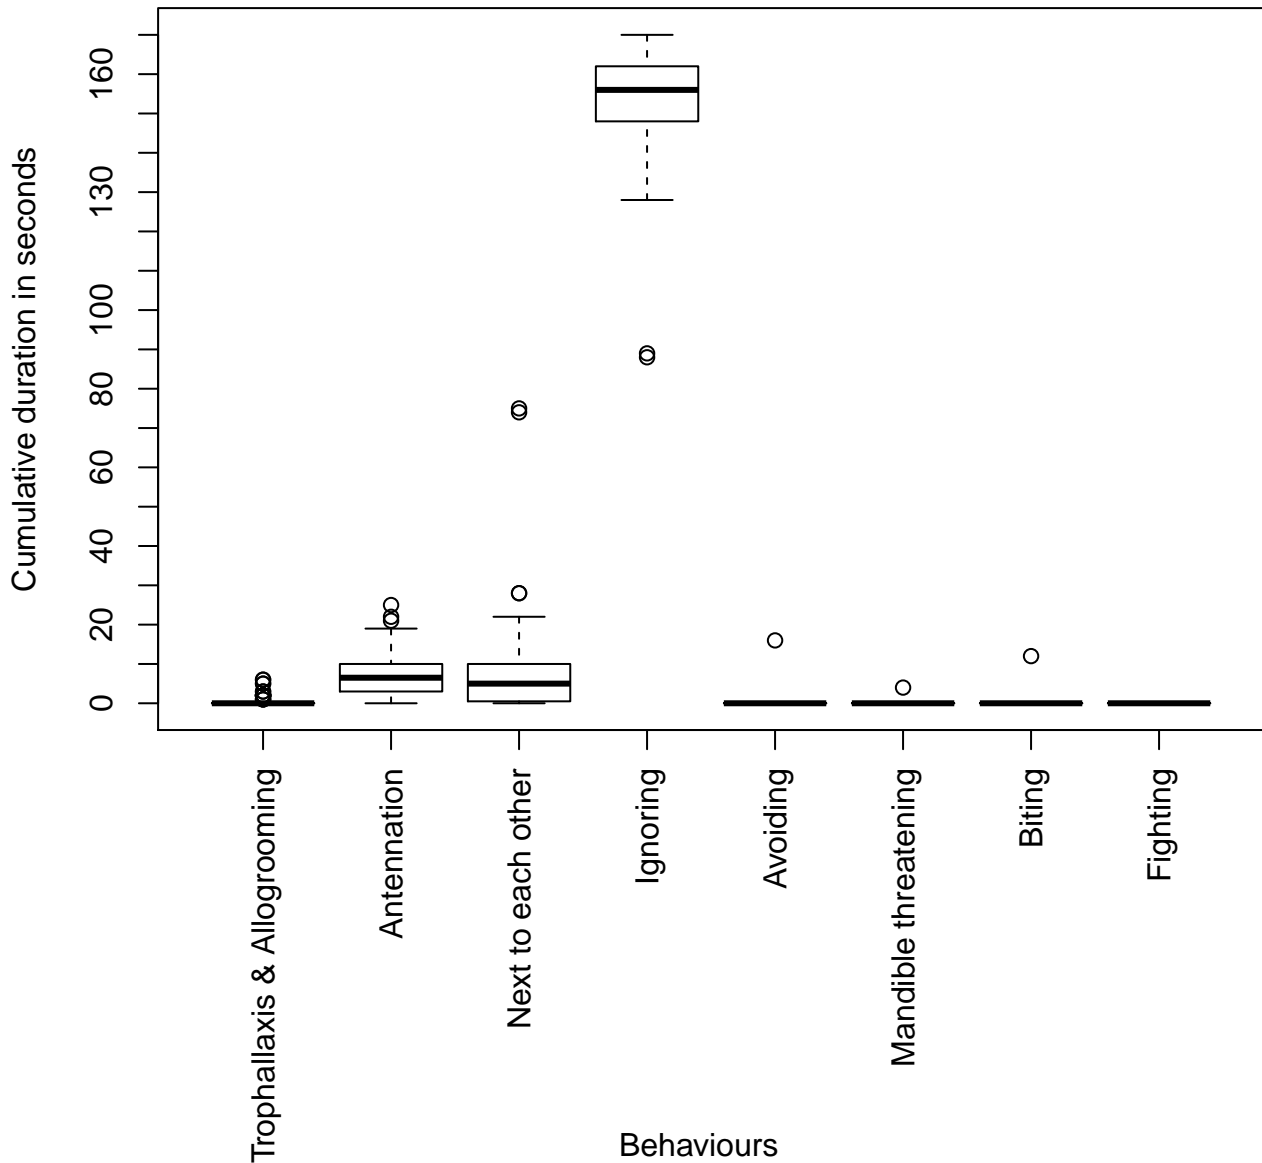

Fig. S6. Behaviour frequency boxplot of all intranest encounters of Data Set 3 (n = 11).

### Data Set 3 – internet encounters

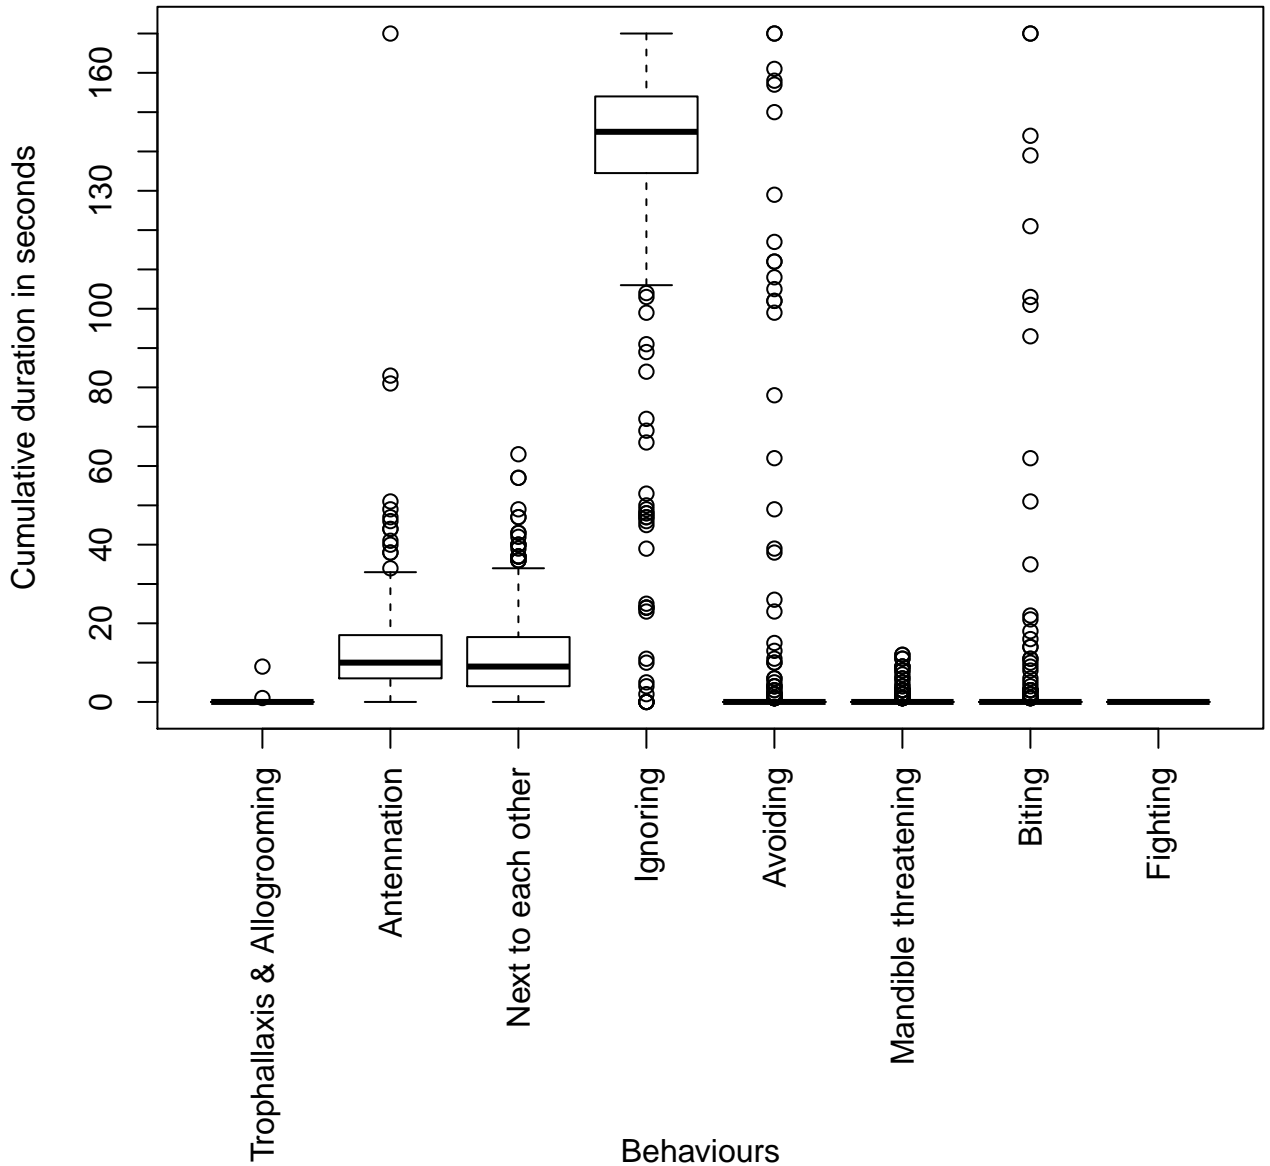

Fig. S7. Behaviour frequency boxplot of all internet encounters of Data Set 3 (n = 55).
